# Supplementary material for: Saving the locals: a conservation genomics approach to the endangered Spanish Toothcarp, Aphanius iberus (Valenciennes, 1846)
Source: Sci Rep. 2025 Dec 11;16:2150. doi: 10.1038/s41598-025-31909-y (PMC12808277; doi:10.1038/s41598-025-31909-y)
Supplement: Supplementary file 2 — Supplementary Information 2. [file 41598_2025_31909_MOESM2_ESM.xlsx]

## Sheet: Sheet1
Table S2. Table of all specimens included in this study, their Haplotype for the Cytochrome b gene, sex, location and GenBank accession numbers. Samples in bold have been used for WGS.
Species	Specimen Code	HAPLOTYPE	WGS	SEX	Latitude	Longitude	Locality	Locality code	Lineage	GenBank Accession No.
Aphanius iberus	CN21666	H3	NO	UNDET	42.218	3.11311	Clot de la Llúdriga (PNAE-Nord)	1	North Catalonia	XXX
Aphanius iberus	CN21702	H3	NO	MALE	42.218	3.11311	Clot de la Llúdriga (PNAE-Nord)	1	North Catalonia	XXX
Aphanius iberus	CN21601	H3	NO	FEMALE	42.218	3.11311	Clot de la Llúdriga (PNAE-Nord)	1	North Catalonia	XXX
Aphanius iberus	CN21664	H3	NO	MALE	42.218	3.11311	Clot de la Llúdriga (PNAE-Nord)	1	North Catalonia	XXX
Aphanius iberus	CN21687	H3	NO	JUVENILE	42.218	3.11311	Clot de la Llúdriga (PNAE-Nord)	1	North Catalonia	XXX
Aphanius iberus	CN21605	H3	NO	JUVENILE	42.218	3.11311	Clot de la Llúdriga (PNAE-Nord)	1	North Catalonia	XXX
Aphanius iberus	CN21606	H3	NO	JUVENILE	42.218	3.11311	Clot de la Llúdriga (PNAE-Nord)	1	North Catalonia	XXX
Aphanius iberus	CN21646	H3	NO	JUVENILE	42.218	3.11311	Clot de la Llúdriga (PNAE-Nord)	1	North Catalonia	XXX
Aphanius iberus	CN21603	H3	NO	JUVENILE	42.218	3.11311	Clot de la Llúdriga (PNAE-Nord)	1	North Catalonia	XXX
Aphanius iberus	CN21624	H3	NO	JUVENILE	42.218	3.11311	Clot de la Llúdriga (PNAE-Nord)	1	North Catalonia	XXX
Aphanius iberus	AF299276	H39	NO	UNDET	42.2273	3.10504	Alt Empordà Nord	1	North Catalonia	AF299276
Aphanius iberus	AF299277	H39	NO	UNDET	42.2273	3.10504	Alt Empordà Nord	1	North Catalonia	AF299277
Aphanius iberus	KU174217	H39	NO	UNDET	42.2273	3.10504	Alt Empordà Nord	1	North Catalonia	KU174217
Aphanius iberus	KU174218	H39	NO	UNDET	42.2273	3.10504	Alt Empordà Nord	1	North Catalonia	KU174218
Aphanius iberus	CN21623	H80	YES	FEMALE	42.218	3.11311	Clot de la Llúdriga (PNAE-Nord)	1	North Catalonia	XXX
Aphanius iberus	CN21783	H3	NO	MALE	42.0467	3.19278	Bassa del Pi (Pletera)	2	North Catalonia	XXX
Aphanius iberus	CN21789	H3	NO	FEMALE	42.0467	3.19278	Bassa del Pi (Pletera)	2	North Catalonia	XXX
Aphanius iberus	CN21781	H3	NO	FEMALE	42.0467	3.19278	Bassa del Pi (Pletera)	2	North Catalonia	XXX
Aphanius iberus	CN21785	H2	NO	FEMALE	42.0467	3.19278	Bassa del Pi (Pletera)	2	North Catalonia	XXX
Aphanius iberus	CN21794	H2	NO	FEMALE	42.0467	3.19278	Bassa del Pi (Pletera)	2	North Catalonia	XXX
Aphanius iberus	CN21798	H3	NO	FEMALE	42.0467	3.19278	Bassa del Pi (Pletera)	2	North Catalonia	XXX
Aphanius iberus	CN21790	H3	NO	FEMALE	42.0467	3.19278	Bassa del Pi (Pletera)	2	North Catalonia	XXX
Aphanius iberus	CN21784	H3	YES	MALE	42.0467	3.19278	Bassa del Pi (Pletera)	2	North Catalonia	XXX
Aphanius iberus	CN21782	H2	YES	FEMALE	42.0467	3.19278	Bassa del Pi (Pletera)	2	North Catalonia	XXX
Aphanius iberus	CN21807	H17	NO	MALE	41.5454	2.1988	Pinetons- Mollet del Vallès	3	Levante	XXX
Aphanius iberus	CN21808	H17	NO	MALE	41.5454	2.1988	Pinetons- Mollet del Vallès	3	Levante	XXX
Aphanius iberus	CN21806	H17	YES	FEMALE	41.5454	2.1988	Pinetons- Mollet del Vallès	3	Levante	XXX
Aphanius iberus	CN21809	H15	YES	FEMALE	41.4971	2.03493	Rubí	4	South Catalonia	XXX
Aphanius iberus	CN21810	H79	YES	FEMALE	41.4971	2.03493	Rubí	4	South Catalonia	XXX
Aphanius iberus	CN21812	H3	NO	FEMALE	41.4721	2.08652	Sant Cugat	5	North Catalonia + Levante	XXX
Aphanius iberus	CN21813	H3	NO	FEMALE	41.4721	2.08652	Sant Cugat	5	North Catalonia + Levante	XXX
Aphanius iberus	CN21814	H3	YES	FEMALE	41.4721	2.08652	Sant Cugat	5	North Catalonia + Levante	XXX
Aphanius iberus	CN21580	H5	NO	FEMALE	41.3891	2.18817	ZOO BCN	6	South Catalonia/North Catalonia	XXX
Aphanius iberus	CN21581	H5	NO	MALE	41.3891	2.18817	ZOO BCN	6	South Catalonia/North Catalonia	XXX
Aphanius iberus	CN21583	H5	NO	FEMALE	41.3891	2.18817	ZOO BCN	6	South Catalonia/North Catalonia	XXX
Aphanius iberus	CN21582	H5	YES	FEMALE	41.3891	2.18817	ZOO BCN	6	South Catalonia/North Catalonia	XXX
Aphanius iberus	CN21772	H5	NO	MALE	41.2849	2.09744	Bassa Pineda Can Camins (El Prat)	7	South Catalonia/North Catalonia	XXX
Aphanius iberus	CN21769	H5	NO	MALE	41.2849	2.09744	Bassa Pineda Can Camins (El Prat)	7	South Catalonia/North Catalonia	XXX
Aphanius iberus	CN21774	H5	NO	FEMALE	41.2849	2.09744	Bassa Pineda Can Camins (El Prat)	7	South Catalonia/North Catalonia	XXX
Aphanius iberus	CN21771	H5	NO	FEMALE	41.2849	2.09744	Bassa Pineda Can Camins (El Prat)	7	South Catalonia/North Catalonia	XXX
Aphanius iberus	CN21768	H5	NO	MALE	41.2849	2.09744	Bassa Pineda Can Camins (El Prat)	7	South Catalonia/North Catalonia	XXX
Aphanius iberus	CN21770	H5	NO	FEMALE	41.2849	2.09744	Bassa Pineda Can Camins (El Prat)	7	South Catalonia/North Catalonia	XXX
Aphanius iberus	CN21776	H5	NO	MALE	41.2849	2.09744	Bassa Pineda Can Camins (El Prat)	7	South Catalonia/North Catalonia	XXX
Aphanius iberus	CN21779	H5	NO	FEMALE	41.2849	2.09744	Bassa Pineda Can Camins (El Prat)	7	South Catalonia/North Catalonia	XXX
Aphanius iberus	CN21778	H5	NO	MALE	41.2849	2.09744	Bassa Pineda Can Camins (El Prat)	7	South Catalonia/North Catalonia	XXX
Aphanius iberus	CN21777	H5	YES	FEMALE	41.2849	2.09744	Bassa Pineda Can Camins (El Prat)	7	South Catalonia/North Catalonia	XXX
Aphanius iberus	CN21816	H5	NO	FEMALE	41.3023	2.1291	Prat	8	South Catalonia/North Catalonia	XXX
Aphanius iberus	CN21817	H5	NO	FEMALE	41.3023	2.1291	Prat	8	South Catalonia/North Catalonia	XXX
Aphanius iberus	CN21815	H5	YES	FEMALE	41.3023	2.1291	Prat	8	South Catalonia/North Catalonia	XXX
Aphanius iberus	CN21633	H16	NO	FEMALE	41.1843	1.54815	Madrigueres	9	South Catalonia	XXX
Aphanius iberus	CN21693	H16	NO	FEMALE	41.1843	1.54815	Madrigueres	9	South Catalonia	XXX
Aphanius iberus	CN21708	H16	NO	FEMALE	41.1843	1.54815	Madrigueres	9	South Catalonia	XXX
Aphanius iberus	CN21720	H16	NO	FEMALE	41.1843	1.54815	Madrigueres	9	South Catalonia	XXX
Aphanius iberus	CN21615	H16	NO	FEMALE	41.1843	1.54815	Madrigueres	9	South Catalonia	XXX
Aphanius iberus	CN21717	H16	NO	FEMALE	41.1843	1.54815	Madrigueres	9	South Catalonia	XXX
Aphanius iberus	CN21674	H16	NO	FEMALE	41.1843	1.54815	Madrigueres	9	South Catalonia	XXX
Aphanius iberus	CN21616	H16	NO	FEMALE	41.1843	1.54815	Madrigueres	9	South Catalonia	XXX
Aphanius iberus	CN21709	H16	NO	FEMALE	41.1843	1.54815	Madrigueres	9	South Catalonia	XXX
Aphanius iberus	CN21596	H16	YES	FEMALE	41.1843	1.54815	Madrigueres	9	South Catalonia	XXX
Aphanius iberus	CN21750	H3	NO	MALE	41.1617	1.45469	Riera de Murtra	10	North Catalonia	XXX
Aphanius iberus	CN21690	H3	NO	MALE	41.1617	1.45469	Riera de Murtra	10	North Catalonia	XXX
Aphanius iberus	CN21722	H3	NO	MALE	41.1617	1.45469	Riera de Murtra	10	North Catalonia	XXX
Aphanius iberus	CN21753	H3	NO	MALE	41.1617	1.45469	Riera de Murtra	10	North Catalonia	XXX
Aphanius iberus	CN21669	H3	NO	MALE	41.1617	1.45469	Riera de Murtra	10	North Catalonia	XXX
Aphanius iberus	CN21749	H3	NO	FEMALE	41.1617	1.45469	Riera de Murtra	10	North Catalonia	XXX
Aphanius iberus	CN21611	H3	NO	FEMALE	41.1617	1.45469	Riera de Murtra	10	North Catalonia	XXX
Aphanius iberus	CN21713	H3	NO	FEMALE	41.1617	1.45469	Riera de Murtra	10	North Catalonia	XXX
Aphanius iberus	CN21589	H3	NO	FEMALE	41.1617	1.45469	Riera de Murtra	10	North Catalonia	XXX
Aphanius iberus	CN21766	H3	YES	FEMALE	41.1617	1.45469	Riera de Murtra	10	North Catalonia	XXX
Aphanius iberus	CN21595	H16	NO	FEMALE	41.1332	1.3655	Bassa nova Gaià - Plana del Vinyet	11	South Catalonia	XXX
Aphanius iberus	CN21741	H16	NO	MALE	41.1332	1.3655	Bassa nova Gaià - Plana del Vinyet	11	South Catalonia	XXX
Aphanius iberus	CN21677	H16	NO	FEMALE	41.1332	1.3655	Bassa nova Gaià - Plana del Vinyet	11	South Catalonia	XXX
Aphanius iberus	CN21697	H16	NO	FEMALE	41.1332	1.3655	Bassa nova Gaià - Plana del Vinyet	11	South Catalonia	XXX
Aphanius iberus	CN21752	H16	NO	FEMALE	41.1332	1.3655	Bassa nova Gaià - Plana del Vinyet	11	South Catalonia	XXX
Aphanius iberus	CN21721	H16	NO	MALE	41.1332	1.3655	Bassa nova Gaià - Plana del Vinyet	11	South Catalonia	XXX
Aphanius iberus	CN21740	H16	NO	MALE	41.1332	1.3655	Bassa nova Gaià - Plana del Vinyet	11	South Catalonia	XXX
Aphanius iberus	CN21661	H16	NO	MALE	41.1332	1.3655	Bassa nova Gaià - Plana del Vinyet	11	South Catalonia	XXX
Aphanius iberus	CN21738	H16	NO	MALE	41.1332	1.3655	Bassa nova Gaià - Plana del Vinyet	11	South Catalonia	XXX
Aphanius iberus	CN21756	H16	YES	FEMALE	41.1332	1.3655	Bassa nova Gaià - Plana del Vinyet	11	South Catalonia	XXX
Aphanius iberus	CN21641	H15	NO	FEMALE	41.0845	1.17879	Tributaris Sèquia Major - Salou	12	South Catalonia/North Catalonia	XXX
Aphanius iberus	CN21757	H15	NO	FEMALE	41.0845	1.17879	Tributaris Sèquia Major - Salou	12	South Catalonia/North Catalonia	XXX
Aphanius iberus	CN21710	H19	NO	FEMALE	41.0845	1.17879	Tributaris Sèquia Major - Salou	12	South Catalonia/North Catalonia	XXX
Aphanius iberus	CN21676	H18	NO	MALE	41.0845	1.17879	Tributaris Sèquia Major - Salou	12	South Catalonia/North Catalonia	XXX
Aphanius iberus	CN21679	H20	NO	MALE	41.0845	1.17879	Tributaris Sèquia Major - Salou	12	South Catalonia/North Catalonia	XXX
Aphanius iberus	CN21621	H15	NO	MALE	41.0845	1.17879	Tributaris Sèquia Major - Salou	12	South Catalonia/North Catalonia	XXX
Aphanius iberus	CN21678	H16	NO	MALE	41.0845	1.17879	Tributaris Sèquia Major - Salou	12	South Catalonia/North Catalonia	XXX
Aphanius iberus	CN21591	H11	YES	FEMALE	41.0845	1.17879	Tributaris Sèquia Major - Salou	12	South Catalonia/North Catalonia	XXX
Aphanius iberus	CN21728	H19	YES	FEMALE	41.0845	1.17879	Tributaris Sèquia Major - Salou	12	South Catalonia/North Catalonia	XXX
Aphanius iberus	CN21655	H18	YES	MALE	41.0845	1.17879	Tributaris Sèquia Major - Salou	12	South Catalonia/North Catalonia	XXX
Aphanius iberus	CN21680	H16	NO	FEMALE	41.0215	0.953777	Estany Gelat	13	North Catalonia	XXX
Aphanius iberus	CN21593	H16	NO	FEMALE	41.0215	0.953777	Estany Gelat	13	North Catalonia	XXX
Aphanius iberus	CN21695	H16	NO	FEMALE	41.0215	0.953777	Estany Gelat	13	North Catalonia	XXX
Aphanius iberus	CN21618	H3	NO	MALE	41.0215	0.953777	Estany Gelat	13	North Catalonia	XXX
Aphanius iberus	CN21683	H3	NO	MALE	41.0215	0.953777	Estany Gelat	13	North Catalonia	XXX
Aphanius iberus	CN21653	H16	NO	MALE	41.0215	0.953777	Estany Gelat	13	North Catalonia	XXX
Aphanius iberus	CN21652	H3	NO	MALE	41.0215	0.953777	Estany Gelat	13	North Catalonia	XXX
Aphanius iberus	CN21758	H16	YES	FEMALE	41.0215	0.953777	Estany Gelat	13	North Catalonia	XXX
Aphanius iberus	CN21656	H3	YES	FEMALE	41.0215	0.953777	Estany Gelat	13	North Catalonia	XXX
Aphanius iberus	CN21682	H18	YES	MALE	41.0215	0.953777	Estany Gelat	13	North Catalonia	XXX
Aphanius iberus	CN21658	H3	NO	FEMALE	40.9925	0.930532	Riera de Llastres	14	North Catalonia	XXX
Aphanius iberus	CN21614	H3	NO	FEMALE	40.9925	0.930532	Riera de Llastres	14	North Catalonia	XXX
Aphanius iberus	CN21711	H3	NO	FEMALE	40.9925	0.930532	Riera de Llastres	14	North Catalonia	XXX
Aphanius iberus	CN21634	H3	NO	FEMALE	40.9925	0.930532	Riera de Llastres	14	North Catalonia	XXX
Aphanius iberus	CN21718	H3	NO	MALE	40.9925	0.930532	Riera de Llastres	14	North Catalonia	XXX
Aphanius iberus	CN21620	H3	NO	MALE	40.9925	0.930532	Riera de Llastres	14	North Catalonia	XXX
Aphanius iberus	CN21719	H3	NO	MALE	40.9925	0.930532	Riera de Llastres	14	North Catalonia	XXX
Aphanius iberus	CN21599	H3	NO	MALE	40.9925	0.930532	Riera de Llastres	14	North Catalonia	XXX
Aphanius iberus	CN21684	H3	NO	MALE	40.9925	0.930532	Riera de Llastres	14	North Catalonia	XXX
Aphanius iberus	CN21703	H3	YES	FEMALE	40.9925	0.930532	Riera de Llastres	14	North Catalonia	XXX
Aphanius iberus	CN21755	H1	NO	FEMALE	40.9119	0.830924	Sant Jordi d'Alfama	15	South Catalonia/North Catalonia	XXX
Aphanius iberus	CN21619	H1	NO	FEMALE	40.9119	0.830924	Sant Jordi d'Alfama	15	South Catalonia/North Catalonia	XXX
Aphanius iberus	CN21723	H15	NO	FEMALE	40.9119	0.830924	Sant Jordi d'Alfama	15	South Catalonia/North Catalonia	XXX
Aphanius iberus	CN21705	H15	NO	MALE	40.9119	0.830924	Sant Jordi d'Alfama	15	South Catalonia/North Catalonia	XXX
Aphanius iberus	CN21643	H15	NO	MALE	40.9119	0.830924	Sant Jordi d'Alfama	15	South Catalonia/North Catalonia	XXX
Aphanius iberus	CN21736	H15	NO	MALE	40.9119	0.830924	Sant Jordi d'Alfama	15	South Catalonia/North Catalonia	XXX
Aphanius iberus	CN21654	H15	NO	MALE	40.9119	0.830924	Sant Jordi d'Alfama	15	South Catalonia/North Catalonia	XXX
Aphanius iberus	CN21642	H11	YES	FEMALE	40.9119	0.830924	Sant Jordi d'Alfama	15	South Catalonia/North Catalonia	XXX
Aphanius iberus	CN21657	H15	YES	FEMALE	40.9119	0.830924	Sant Jordi d'Alfama	15	South Catalonia/North Catalonia	XXX
Aphanius iberus	CN21598	H1	YES	MALE	40.9119	0.830924	Sant Jordi d'Alfama	15	South Catalonia/North Catalonia	XXX
Aphanius iberus	CN21712	H15	NO	MALE	40.8946	0.81492	Estany Tort	16	South Catalonia/North Catalonia	XXX
Aphanius iberus	CN21613	H15	NO	FEMALE	40.8946	0.81492	Estany Tort	16	South Catalonia/North Catalonia	XXX
Aphanius iberus	CN21731	H15	NO	MALE	40.8946	0.81492	Estany Tort	16	South Catalonia/North Catalonia	XXX
Aphanius iberus	CN21694	H15	NO	MALE	40.8946	0.81492	Estany Tort	16	South Catalonia/North Catalonia	XXX
Aphanius iberus	CN21686	H15	NO	MALE	40.8946	0.81492	Estany Tort	16	South Catalonia/North Catalonia	XXX
Aphanius iberus	CN21663	H15	NO	FEMALE	40.8946	0.81492	Estany Tort	16	South Catalonia/North Catalonia	XXX
Aphanius iberus	CN21763	H15	NO	FEMALE	40.8946	0.81492	Estany Tort	16	South Catalonia/North Catalonia	XXX
Aphanius iberus	CN21734	H15	NO	FEMALE	40.8946	0.81492	Estany Tort	16	South Catalonia/North Catalonia	XXX
Aphanius iberus	CN21640	H15	YES	FEMALE	40.8946	0.81492	Estany Tort	16	South Catalonia/North Catalonia	XXX
Aphanius iberus	CN21659	H11	NO	MALE	40.9001	0.822047	Torrent del Pi	17	South Catalonia/North Catalonia	XXX
Aphanius iberus	CN21592	H19	NO	MALE	40.9001	0.822047	Torrent del Pi	17	South Catalonia/North Catalonia	XXX
Aphanius iberus	CN21696	H5	NO	MALE	40.9001	0.822047	Torrent del Pi	17	South Catalonia/North Catalonia	XXX
Aphanius iberus	CN21617	H20	NO	MALE	40.9001	0.822047	Torrent del Pi	17	South Catalonia/North Catalonia	XXX
Aphanius iberus	CN21759	H18	NO	MALE	40.9001	0.822047	Torrent del Pi	17	South Catalonia/North Catalonia	XXX
Aphanius iberus	CN21662	H18	NO	FEMALE	40.9001	0.822047	Torrent del Pi	17	South Catalonia/North Catalonia	XXX
Aphanius iberus	CN21660	H20	NO	FEMALE	40.9001	0.822047	Torrent del Pi	17	South Catalonia/North Catalonia	XXX
Aphanius iberus	CN21638	H1	YES	MALE	40.9001	0.822047	Torrent del Pi	17	South Catalonia/North Catalonia	XXX
Aphanius iberus	CN21754	H15	YES	FEMALE	40.9001	0.822047	Torrent del Pi	17	South Catalonia/North Catalonia	XXX
Aphanius iberus	CN21681	H20	YES	FEMALE	40.9001	0.822047	Torrent del Pi	17	South Catalonia/North Catalonia	XXX
Aphanius iberus	CN21630	H16	NO	FEMALE	40.7363	0.798797	Canal Vell	18	South Catalonia	XXX
Aphanius iberus	CN21673	H16	NO	FEMALE	40.7363	0.798797	Canal Vell	18	South Catalonia	XXX
Aphanius iberus	CN21635	H16	NO	FEMALE	40.7363	0.798797	Canal Vell	18	South Catalonia	XXX
Aphanius iberus	CN21751	H16	NO	FEMALE	40.7363	0.798797	Canal Vell	18	South Catalonia	XXX
Aphanius iberus	CN21692	H16	NO	MALE	40.7363	0.798797	Canal Vell	18	South Catalonia	XXX
Aphanius iberus	CN21706	H4	YES	FEMALE	40.7363	0.798797	Canal Vell	18	South Catalonia	XXX
Aphanius iberus	CN21760	H10	YES	FEMALE	40.7363	0.798797	Canal Vell	18	South Catalonia	XXX
Aphanius iberus	CN21608	H12	YES	FEMALE	40.7363	0.798797	Canal Vell	18	South Catalonia	XXX
Aphanius iberus	CN21639	H11	NO	MALE	40.7086	0.853702	Buda - Maresmes	19	South Catalonia	XXX
Aphanius iberus	CN21704	H13	NO	MALE	40.7086	0.853702	Buda - Maresmes	19	South Catalonia	XXX
Aphanius iberus	CN21671	H16	NO	MALE	40.7086	0.853702	Buda - Maresmes	19	South Catalonia	XXX
Aphanius iberus	CN21668	H13	NO	FEMALE	40.7086	0.853702	Buda - Maresmes	19	South Catalonia	XXX
Aphanius iberus	CN21739	H16	NO	MALE	40.7086	0.853702	Buda - Maresmes	19	South Catalonia	XXX
Aphanius iberus	CN21650	H11	NO	FEMALE	40.7086	0.853702	Buda - Maresmes	19	South Catalonia	XXX
Aphanius iberus	CN21732	H10	YES	MALE	40.7086	0.853702	Buda - Maresmes	19	South Catalonia	XXX
Aphanius iberus	CN21637	H13	YES	MALE	40.7086	0.853702	Buda - Maresmes	19	South Catalonia	XXX
Aphanius iberus	CN21631	H9	NO	FEMALE	40.6495	0.735937	Maresmes - Tancada	20	South Catalonia	XXX
Aphanius iberus	CN21649	H16	NO	FEMALE	40.6495	0.735937	Maresmes - Tancada	20	South Catalonia	XXX
Aphanius iberus	CN21742	H16	NO	FEMALE	40.6495	0.735937	Maresmes - Tancada	20	South Catalonia	XXX
Aphanius iberus	CN21594	H16	NO	MALE	40.6495	0.735937	Maresmes - Tancada	20	South Catalonia	XXX
Aphanius iberus	CN21698	H16	NO	MALE	40.6495	0.735937	Maresmes - Tancada	20	South Catalonia	XXX
Aphanius iberus	CN21691	H16	NO	MALE	40.6495	0.735937	Maresmes - Tancada	20	South Catalonia	XXX
Aphanius iberus	CN21743	H16	NO	FEMALE	40.6495	0.735937	Maresmes - Tancada	20	South Catalonia	XXX
Aphanius iberus	CN21609	H16	NO	FEMALE	40.5653	0.671207	Punta de la Banya	20	South Catalonia	XXX
Aphanius iberus	CN21688	H9	YES	FEMALE	40.6495	0.735937	Maresmes - Tancada	20	South Catalonia	XXX
Aphanius iberus	CN21730	H14	YES	MALE	40.6495	0.735937	Maresmes - Tancada	20	South Catalonia	XXX
Aphanius iberus	CN21700	H13	YES	MALE	40.6495	0.735937	Maresmes - Tancada	20	South Catalonia	XXX
Aphanius iberus	CN21725	H13	NO	MALE	40.5653	0.671207	Punta de la Banya	21	South Catalonia	XXX
Aphanius iberus	CN21607	H16	NO	UNDET	40.5653	0.671207	Punta de la Banya	21	South Catalonia	XXX
Aphanius iberus	CN21726	H16	NO	MALE	40.5653	0.671207	Punta de la Banya	21	South Catalonia	XXX
Aphanius iberus	CN21764	H16	NO	UNDET	40.5653	0.671207	Punta de la Banya	21	South Catalonia	XXX
Aphanius iberus	CN21672	H7	NO	UNDET	40.5653	0.671207	Punta de la Banya	21	South Catalonia	XXX
Aphanius iberus	CN21714	H16	NO	UNDET	40.5653	0.671207	Punta de la Banya	21	South Catalonia	XXX
Aphanius iberus	CN21632	H6	YES	MALE	40.5653	0.671207	Punta de la Banya	21	South Catalonia	XXX
Aphanius iberus	CN21727	H8	YES	UNDET	40.5653	0.671207	Punta de la Banya	21	South Catalonia	XXX
Aphanius iberus	CN21715	H7	YES	UNDET	40.5653	0.671207	Punta de la Banya	21	South Catalonia	XXX
Aphanius iberus	AT29863	-	NO	UNDET	40.1463	0.169576	Cabanes	22	Levante/South Catalonia	XXX
Aphanius iberus	AT29861	-	YES	UNDET	40.1463	0.169576	Cabanes	22	Levante/South Catalonia	XXX
Aphanius iberus	AT 29086	-	NO	UNDET	39.5447	-0.325989	Albuixec	23	Levante	XXX
Aphanius iberus	AF299287	H38	NO	UNDET	39.5387	-0.314867	Albuixec	23	Levante	AF299287
Aphanius iberus	KU174220	H40	NO	UNDET	39.5387	-0.314867	Albuixec	23	Levante	KU174220
Aphanius iberus	AF299286	H41	NO	UNDET	39.5387	-0.314867	Albuixec	23	Levante	AF299286
Aphanius iberus	KU174221	H45	NO	UNDET	39.5387	-0.314867	Albuixec	23	Levante	KU174221
Aphanius iberus	KU174232	H55	NO	UNDET	39.5387	-0.314867	Albuixec	23	Levante	KU174232
Aphanius iberus	KU174350	H77	NO	UNDET	39.5387	-0.314867	Albuixec	23	Levante	KU174350
Aphanius iberus	KU174345	H78	NO	UNDET	39.5387	-0.314867	Albuixec	23	Levante	KU174345
Aphanius iberus	KU174346	H78	NO	UNDET	39.5387	-0.314867	Albuixec	23	Levante	KU174346
Aphanius iberus	KU174347	H78	NO	UNDET	39.5387	-0.314867	Albuixec	23	Levante	KU174347
Aphanius iberus	KU174348	H78	NO	UNDET	39.5387	-0.314867	Albuixec	23	Levante	KU174348
Aphanius iberus	KU174349	H78	NO	UNDET	39.5387	-0.314867	Albuixec	23	Levante	KU174349
Aphanius iberus	AT 29087	-	YES	UNDET	39.5447	-0.325989	Albuixec	23	Levante	XXX
Aphanius iberus	AT 29057	-	NO	UNDET	38.5354	-0.821934	Sax	24	Levante/South Spain	XXX
Aphanius iberus	KU174388	H28	NO	UNDET	38.5414	-0.815279	Sax	24	Levante/South Spain	KU174388
Aphanius iberus	KU174389	H29	NO	UNDET	38.5414	-0.815279	Sax	24	Levante/South Spain	KU174389
Aphanius iberus	AF299290	H32	NO	UNDET	38.5414	-0.815279	Sax	24	Levante/South Spain	AF299290
Aphanius iberus	KU174381	H33	NO	UNDET	38.5414	-0.815279	Sax	24	Levante/South Spain	KU174381
Aphanius iberus	KU174382	H34	NO	UNDET	38.5414	-0.815279	Sax	24	Levante/South Spain	KU174382
Aphanius iberus	KU174383	H35	NO	UNDET	38.5414	-0.815279	Sax	24	Levante/South Spain	KU174383
Aphanius iberus	KU174384	H36	NO	UNDET	38.5414	-0.815279	Sax	24	Levante/South Spain	KU174384
Aphanius iberus	KU174385	H37	NO	UNDET	38.5414	-0.815279	Sax	24	Levante/South Spain	KU174385
Aphanius iberus	KU174386	H37	NO	UNDET	38.5414	-0.815279	Sax	24	Levante/South Spain	KU174386
Aphanius iberus	KU174387	H37	NO	UNDET	38.5414	-0.815279	Sax	24	Levante/South Spain	KU174387
Aphanius iberus	AT 29056	-	YES	UNDET	38.5354	-0.821934	Sax	24	Levante/South Spain	XXX
Aphanius iberus	AT 29066	-	NO	UNDET	38.1969	-0.560314	Santa Pola	25	South Spain	XXX
Aphanius iberus	DQ367528	H72	NO	UNDET	38.1972	-0.57858	Santa Pola	25	South Spain	DQ367528
Aphanius iberus	KU174366	H72	NO	UNDET	38.1972	-0.57858	Santa Pola	25	South Spain	KU174366
Aphanius iberus	KU174367	H72	NO	UNDET	38.1972	-0.57858	Santa Pola	25	South Spain	KU174367
Aphanius iberus	KU174368	H72	NO	UNDET	38.1972	-0.57858	Santa Pola	25	South Spain	KU174368
Aphanius iberus	KU174369	H72	NO	UNDET	38.1972	-0.57858	Santa Pola	25	South Spain	KU174369
Aphanius iberus	KU174370	H72	NO	UNDET	38.1972	-0.57858	Santa Pola	25	South Spain	KU174370
Aphanius iberus	KU174371	H72	NO	UNDET	38.1972	-0.57858	Santa Pola	25	South Spain	KU174371
Aphanius iberus	KU174372	H72	NO	UNDET	38.1972	-0.57858	Santa Pola	25	South Spain	KU174372
Aphanius iberus	KU174373	H72	NO	UNDET	38.1972	-0.57858	Santa Pola	25	South Spain	KU174373
Aphanius iberus	KU174374	H72	NO	UNDET	38.1972	-0.57858	Santa Pola	25	South Spain	KU174374
Aphanius iberus	KU174375	H72	NO	UNDET	38.1972	-0.57858	Santa Pola	25	South Spain	KU174375
Aphanius iberus	KU174376	H72	NO	UNDET	38.1972	-0.57858	Santa Pola	25	South Spain	KU174376
Aphanius iberus	KU174377	H72	NO	UNDET	38.1972	-0.57858	Santa Pola	25	South Spain	KU174377
Aphanius iberus	AT 29067	-	YES	UNDET	38.1969	-0.560314	Santa Pola	25	South Spain	XXX
Aphanius iberus	AT 4838	-	NO	UNDET	37.1768	-2.27521	San Pedro del Pinatar	26	South Spain	XXX
Aphanius iberus	AF299279	H44	NO	UNDET	37.8347	-0.775474	San Pedro del Pinatar	26	South Spain	AF299279
Aphanius iberus	KU174222	H44	NO	UNDET	37.8347	-0.775474	San Pedro del Pinatar	26	South Spain	KU174222
Aphanius iberus	AF299278	H47	NO	UNDET	37.8347	-0.775474	San Pedro del Pinatar	26	South Spain	AF299278
Aphanius iberus	KU174238	H48	NO	UNDET	37.8347	-0.775474	San Pedro del Pinatar	26	South Spain	KU174238
Aphanius iberus	KU174252	H63	NO	UNDET	37.8347	-0.775474	San Pedro del Pinatar	26	South Spain	KU174252
Aphanius iberus	KU174257	H65	NO	UNDET	37.8347	-0.775474	San Pedro del Pinatar	26	South Spain	KU174257
Aphanius iberus	KU174258	H65	NO	UNDET	37.8347	-0.775474	San Pedro del Pinatar	26	South Spain	KU174258
Aphanius iberus	KU174259	H65	NO	UNDET	37.8347	-0.775474	San Pedro del Pinatar	26	South Spain	KU174259
Aphanius iberus	KU174260	H65	NO	UNDET	37.8347	-0.775474	San Pedro del Pinatar	26	South Spain	KU174260
Aphanius iberus	KU174261	H65	NO	UNDET	37.8347	-0.775474	San Pedro del Pinatar	26	South Spain	KU174261
Aphanius iberus	KU174262	H65	NO	UNDET	37.8347	-0.775474	San Pedro del Pinatar	26	South Spain	KU174262
Aphanius iberus	KU174263	H65	NO	UNDET	37.8347	-0.775474	San Pedro del Pinatar	26	South Spain	KU174263
Aphanius iberus	AT 4839	-	YES	UNDET	37.1768	-2.27521	San Pedro del Pinatar	26	South Spain	XXX
Aphanius iberus	AT 5158	-	NO	UNDET	37.5647	-1.29841	Rambla Moreras	27	South Spain	XXX
Aphanius iberus	KU174235	H58	NO	UNDET	37.5625	-1.29997	Rambla Moreras	27	South Spain	KU174235
Aphanius iberus	KU174236	H58	NO	UNDET	37.5625	-1.29997	Rambla Moreras	27	South Spain	KU174236
Aphanius iberus	KU174307	H65	NO	UNDET	37.5625	-1.29997	Rambla Moreras	27	South Spain	KU174307
Aphanius iberus	KU174247	H65	NO	UNDET	37.5625	-1.29997	Rambla Moreras	27	South Spain	KU174247
Aphanius iberus	KU174351	H72	NO	UNDET	37.5625	-1.29997	Rambla Moreras	27	South Spain	KU174351
Aphanius iberus	KU174353	H74	NO	UNDET	37.5625	-1.29997	Rambla Moreras	27	South Spain	KU174353
Aphanius iberus	KU174357	H72	NO	UNDET	37.5625	-1.29997	Rambla Moreras	27	South Spain	KU174357
Aphanius iberus	KU174358	H72	NO	UNDET	37.5625	-1.29997	Rambla Moreras	27	South Spain	KU174358
Aphanius iberus	KU174249	H72	NO	UNDET	37.5625	-1.29997	Rambla Moreras	27	South Spain	KU174249
Aphanius iberus	AT 5157	-	YES	UNDET	37.5647	-1.29841	Rambla Moreras	27	South Spain	XXX
Aphanius iberus	AT 29850	-	NO	UNDET	36.7815	-3.03519	Adra	28	Levante	XXX
Aphanius iberus	AF299275	H49	NO	UNDET	36.8259	-3.0218	Adra	28	Levante	AF299275
Aphanius iberus	AF299274	H50	NO	UNDET	36.8259	-3.0218	Adra	28	Levante	AF299274
Aphanius iberus	KU174224	H50	NO	UNDET	36.8259	-3.0218	Adra	28	Levante	KU174224
Aphanius iberus	KU174225	H49	NO	UNDET	36.8259	-3.0218	Adra	28	Levante	KU174225
Aphanius iberus	KU174228	H52	NO	UNDET	36.8259	-3.0218	Adra	28	Levante	KU174228
Aphanius iberus	KU174319	H68	NO	UNDET	36.8259	-3.0218	Adra	28	Levante	KU174319
Aphanius iberus	KU174227	H52	NO	UNDET	36.8259	-3.0218	Adra	28	Levante	KU174227
Aphanius iberus	KU174320	H52	NO	UNDET	36.8259	-3.0218	Adra	28	Levante	KU174320
Aphanius iberus	KU174321	H52	NO	UNDET	36.8259	-3.0218	Adra	28	Levante	KU174321
Aphanius iberus	KU174322	H52	NO	UNDET	36.8259	-3.0218	Adra	28	Levante	KU174322
Aphanius iberus	KU174323	H52	NO	UNDET	36.8259	-3.0218	Adra	28	Levante	KU174323
Aphanius iberus	KU174324	H52	NO	UNDET	36.8259	-3.0218	Adra	28	Levante	KU174324
Aphanius iberus	AT 29851	-	YES	UNDET	36.7815	-3.03519	Adra	28	Levante	XXX
Aphanius iberus	AT 29871	-	NO	UNDET	40.3736	0.398164	Peñíscola	-	South Catalonia	XXX
Aphanius iberus	AT 29872	-	NO	UNDET	40.3736	0.398164	Peñíscola	-	South Catalonia	XXX
Aphanius iberus	AF299289	H27	NO	UNDET	38.6323	-0.919538	Villena	29	Levante/South Spain	AF299289
Aphanius iberus	KU174380	H27	NO	UNDET	38.6323	-0.919538	Villena	29	Levante/South Spain	KU174380
Aphanius iberus	AF299288	H30	NO	UNDET	38.6323	-0.919538	Villena	29	Levante/South Spain	AF299288
Aphanius iberus	KU174379	H31	NO	UNDET	38.6323	-0.919538	Villena	29	Levante/South Spain	KU174379
Aphanius iberus	KU174229	H52	NO	UNDET	38.6323	-0.919538	Villena	29	Levante/South Spain	KU174229
Aphanius iberus	KU174328	H66	NO	UNDET	38.6323	-0.919538	Villena	29	Levante/South Spain	KU174328
Aphanius iberus	KU174329	H66	NO	UNDET	38.6323	-0.919538	Villena	29	Levante/South Spain	KU174329
Aphanius iberus	KU174325	H52	NO	UNDET	38.6323	-0.919538	Villena	29	Levante/South Spain	KU174325
Aphanius iberus	KU174326	H52	NO	UNDET	38.6323	-0.919538	Villena	29	Levante/South Spain	KU174326
Aphanius iberus	KU174327	H52	NO	UNDET	38.6323	-0.919538	Villena	29	Levante/South Spain	KU174327
Aphanius iberus	KU174342	H70	NO	UNDET	38.6323	-0.919538	Villena	29	Levante/South Spain	KU174342
Aphanius iberus	KU174343	H70	NO	UNDET	38.6323	-0.919538	Villena	29	Levante/South Spain	KU174343
Aphanius iberus	KU174344	H71	NO	UNDET	38.6323	-0.919538	Villena	29	Levante/South Spain	KU174344
Aphanius iberus	KU174239	H60	NO	UNDET	38.3055	-0.719872	Vinalopo	30	South Spain	KU174239
Aphanius iberus	KU174330	H66	NO	UNDET	38.3055	-0.719872	Vinalopo	30	South Spain	KU174330
Aphanius iberus	KU174331	H69	NO	UNDET	38.3055	-0.719872	Vinalopo	30	South Spain	KU174331
Aphanius iberus	KU174332	H69	NO	UNDET	38.3055	-0.719872	Vinalopo	30	South Spain	KU174332
Aphanius iberus	KU174333	H69	NO	UNDET	38.3055	-0.719872	Vinalopo	30	South Spain	KU174333
Aphanius iberus	KU174334	H69	NO	UNDET	38.3055	-0.719872	Vinalopo	30	South Spain	KU174334
Aphanius iberus	KU174335	H69	NO	UNDET	38.3055	-0.719872	Vinalopo	30	South Spain	KU174335
Aphanius iberus	KU174336	H69	NO	UNDET	38.3055	-0.719872	Vinalopo	30	South Spain	KU174336
Aphanius iberus	KU174337	H69	NO	UNDET	38.3055	-0.719872	Vinalopo	30	South Spain	KU174337
Aphanius iberus	KU174338	H69	NO	UNDET	38.3055	-0.719872	Vinalopo	30	South Spain	KU174338
Aphanius iberus	KU174339	H69	NO	UNDET	38.3055	-0.719872	Vinalopo	30	South Spain	KU174339
Aphanius iberus	KU174340	H69	NO	UNDET	38.3055	-0.719872	Vinalopo	30	South Spain	KU174340
Aphanius iberus	KU174341	H69	NO	UNDET	38.3055	-0.719872	Vinalopo	30	South Spain	KU174341
Aphanius iberus	AT 5146	-	NO	UNDET	38.2705	-0.998043	Chicamo	31	South Spain	XXX
Aphanius iberus	AT 5149	-	NO	UNDET	38.2705	-0.998043	Chicamo	31	South Spain	XXX
Aphanius iberus	KU174354	H75	NO	UNDET	38.2605	-1.00229	Chicamo	31	South Spain	KU174354
Aphanius iberus	KU174355	H72	NO	UNDET	38.2605	-1.00229	Chicamo	31	South Spain	KU174355
Aphanius iberus	KU174356	H72	NO	UNDET	38.2605	-1.00229	Chicamo	31	South Spain	KU174356
Aphanius iberus	KU174248	H76	NO	UNDET	38.2605	-1.00229	Chicamo	31	South Spain	KU174248
Aphanius iberus	KU174359	H72	NO	UNDET	38.2605	-1.00229	Chicamo	31	South Spain	KU174359
Aphanius iberus	KU174360	H72	NO	UNDET	38.2605	-1.00229	Chicamo	31	South Spain	KU174360
Aphanius iberus	KU174361	H72	NO	UNDET	38.2605	-1.00229	Chicamo	31	South Spain	KU174361
Aphanius iberus	KU174362	H72	NO	UNDET	38.2605	-1.00229	Chicamo	31	South Spain	KU174362
Aphanius iberus	KU174363	H72	NO	UNDET	38.2605	-1.00229	Chicamo	31	South Spain	KU174363
Aphanius iberus	KU174364	H72	NO	UNDET	38.2605	-1.00229	Chicamo	31	South Spain	KU174364
Aphanius iberus	KU174365	H72	NO	UNDET	38.2605	-1.00229	Chicamo	31	South Spain	KU174365
Aphanius iberus	KU174234	H57	NO	UNDET	37.7974	-0.803028	Santiago de la Ribera	32	South Spain	KU174234
Aphanius iberus	KU174303	H65	NO	UNDET	37.7974	-0.803028	Santiago de la Ribera	32	South Spain	KU174303
Aphanius iberus	KU174304	H65	NO	UNDET	37.7974	-0.803028	Santiago de la Ribera	32	South Spain	KU174304
Aphanius iberus	KU174305	H65	NO	UNDET	37.7974	-0.803028	Santiago de la Ribera	32	South Spain	KU174305
Aphanius iberus	KU174352	H73	NO	UNDET	37.7974	-0.803028	Santiago de la Ribera	32	South Spain	KU174352
Aphanius iberus	KU174240	H62	NO	UNDET	37.6362	-0.716646	La Encañizada	33	South Spain	KU174240
Aphanius iberus	KU174269	H65	NO	UNDET	37.6362	-0.716646	La Encañizada	33	South Spain	KU174269
Aphanius iberus	KU174270	H65	NO	UNDET	37.6362	-0.716646	La Encañizada	33	South Spain	KU174270
Aphanius iberus	KU174271	H65	NO	UNDET	37.6362	-0.716646	La Encañizada	33	South Spain	KU174271
Aphanius iberus	KU174272	H65	NO	UNDET	37.6362	-0.716646	La Encañizada	33	South Spain	KU174272
Aphanius iberus	KU174273	H65	NO	UNDET	37.6362	-0.716646	La Encañizada	33	South Spain	KU174273
Aphanius iberus	KU174274	H65	NO	UNDET	37.6362	-0.716646	La Encañizada	33	South Spain	KU174274
Aphanius iberus	KU174275	H65	NO	UNDET	37.6362	-0.716646	La Encañizada	33	South Spain	KU174275
Aphanius iberus	KU174276	H65	NO	UNDET	37.6362	-0.716646	La Encañizada	33	South Spain	KU174276
Aphanius iberus	KU174277	H65	NO	UNDET	37.6362	-0.716646	La Encañizada	33	South Spain	KU174277
Aphanius iberus	KU174278	H65	NO	UNDET	37.7605	-0.82199	El Hito	34	South Spain	KU174278
Aphanius iberus	KU174279	H65	NO	UNDET	37.7605	-0.82199	El Hito	34	South Spain	KU174279
Aphanius iberus	KU174280	H65	NO	UNDET	37.7605	-0.82199	El Hito	34	South Spain	KU174280
Aphanius iberus	KU174281	H65	NO	UNDET	37.7605	-0.82199	El Hito	34	South Spain	KU174281
Aphanius iberus	KU174282	H65	NO	UNDET	37.7605	-0.82199	El Hito	34	South Spain	KU174282
Aphanius iberus	KU174283	H65	NO	UNDET	37.7605	-0.82199	El Hito	34	South Spain	KU174283
Aphanius iberus	KU174284	H65	NO	UNDET	37.7605	-0.82199	El Hito	34	South Spain	KU174284
Aphanius iberus	KU174285	H65	NO	UNDET	37.7605	-0.82199	El Hito	34	South Spain	KU174285
Aphanius iberus	KU174286	H65	NO	UNDET	37.7605	-0.82199	El Hito	34	South Spain	KU174286
Aphanius iberus	KU174244	H65	NO	UNDET	37.7605	-0.82199	El Hito	34	South Spain	KU174244
Aphanius iberus	KU174223	H46	NO	UNDET	37.7158	-0.862715	Carmoli	35	South Spain	KU174223
Aphanius iberus	KU174231	H54	NO	UNDET	37.7158	-0.862715	Carmoli	35	South Spain	KU174231
Aphanius iberus	KU174287	H65	NO	UNDET	37.7158	-0.862715	Carmoli	35	South Spain	KU174287
Aphanius iberus	KU174288	H65	NO	UNDET	37.7158	-0.862715	Carmoli	35	South Spain	KU174288
Aphanius iberus	KU174289	H65	NO	UNDET	37.7158	-0.862715	Carmoli	35	South Spain	KU174289
Aphanius iberus	KU174290	H65	NO	UNDET	37.7158	-0.862715	Carmoli	35	South Spain	KU174290
Aphanius iberus	KU174291	H65	NO	UNDET	37.7158	-0.862715	Carmoli	35	South Spain	KU174291
Aphanius iberus	KU174292	H65	NO	UNDET	37.7158	-0.862715	Carmoli	35	South Spain	KU174292
Aphanius iberus	KU174293	H65	NO	UNDET	37.7158	-0.862715	Carmoli	35	South Spain	KU174293
Aphanius iberus	KU174226	H51	NO	UNDET	37.687	-0.834029	Los Urritias	36	South Spain	KU174226
Aphanius iberus	KU174233	H56	NO	UNDET	37.687	-0.834029	Los Urritias	36	South Spain	KU174233
Aphanius iberus	KU174299	H65	NO	UNDET	37.687	-0.834029	Los Urritias	36	South Spain	KU174299
Aphanius iberus	KU174300	H65	NO	UNDET	37.687	-0.834029	Los Urritias	36	South Spain	KU174300
Aphanius iberus	KU174301	H65	NO	UNDET	37.687	-0.834029	Los Urritias	36	South Spain	KU174301
Aphanius iberus	KU174302	H65	NO	UNDET	37.687	-0.834029	Los Urritias	36	South Spain	KU174302
Aphanius iberus	KU174250	H65	NO	UNDET	37.687	-0.834029	Los Urritias	36	South Spain	KU174250
Aphanius iberus	KU174294	H65	NO	UNDET	37.6481	-0.772995	Punta Lengua de Vaca	37	South Spain	KU174294
Aphanius iberus	KU174295	H65	NO	UNDET	37.6481	-0.772995	Punta Lengua de Vaca	37	South Spain	KU174295
Aphanius iberus	KU174296	H65	NO	UNDET	37.6481	-0.772995	Punta Lengua de Vaca	37	South Spain	KU174296
Aphanius iberus	KU174297	H65	NO	UNDET	37.6481	-0.772995	Punta Lengua de Vaca	37	South Spain	KU174297
Aphanius iberus	KU174298	H65	NO	UNDET	37.6481	-0.772995	Punta Lengua de Vaca	37	South Spain	KU174298
Aphanius iberus	KU174245	H65	NO	UNDET	37.6481	-0.772995	Punta Lengua de Vaca	37	South Spain	KU174245
Aphanius iberus	KU174230	H53	NO	UNDET	37.6617	-0.734101	El Ciervo	39	South Spain	KU174230
Aphanius iberus	KU174237	H59	NO	UNDET	37.6617	-0.734101	El Ciervo	39	South Spain	KU174237
Aphanius iberus	KU174306	H65	NO	UNDET	37.6617	-0.734101	El Ciervo	39	South Spain	KU174306
Aphanius iberus	KU174313	H65	NO	UNDET	37.6617	-0.734101	El Ciervo	39	South Spain	KU174313
Aphanius iberus	KU174314	H65	NO	UNDET	37.6617	-0.734101	El Ciervo	39	South Spain	KU174314
Aphanius iberus	KU174315	H65	NO	UNDET	37.6617	-0.734101	El Ciervo	39	South Spain	KU174315
Aphanius iberus	KU174316	H65	NO	UNDET	37.6617	-0.734101	El Ciervo	39	South Spain	KU174316
Aphanius iberus	KU174317	H65	NO	UNDET	37.6617	-0.734101	El Ciervo	39	South Spain	KU174317
Aphanius iberus	KU174251	H65	NO	UNDET	37.6617	-0.734101	El Ciervo	39	South Spain	KU174251
Aphanius iberus	KU174246	H65	NO	UNDET	37.6617	-0.734101	El Ciervo	39	South Spain	KU174246
Aphanius iberus	KU174242	H65	NO	UNDET	37.6383	-0.751606	Playa El Arsenal	38	South Spain	KU174242
Aphanius iberus	KU174243	H65	NO	UNDET	37.6383	-0.751606	Playa El Arsenal	38	South Spain	KU174243
Aphanius iberus	DQ367529	H61	NO	UNDET	37.6362	-0.716646	Marchamalo	40	South Spain	DQ367529
Aphanius iberus	KU174241	H61	NO	UNDET	37.6362	-0.716646	Marchamalo	40	South Spain	KU174241
Aphanius iberus	KU174253	H64	NO	UNDET	37.6362	-0.716646	Marchamalo	40	South Spain	KU174253
Aphanius iberus	KU174254	H64	NO	UNDET	37.6362	-0.716646	Marchamalo	40	South Spain	KU174254
Aphanius iberus	KU174255	H65	NO	UNDET	37.6362	-0.716646	Marchamalo	40	South Spain	KU174255
Aphanius iberus	KU174256	H65	NO	UNDET	37.6362	-0.716646	Marchamalo	40	South Spain	KU174256
Aphanius iberus	KU174264	H65	NO	UNDET	37.6362	-0.716646	Marchamalo	40	South Spain	KU174264
Aphanius iberus	KU174265	H65	NO	UNDET	37.6362	-0.716646	Marchamalo	40	South Spain	KU174265
Aphanius iberus	KU174266	H65	NO	UNDET	37.6362	-0.716646	Marchamalo	40	South Spain	KU174266
Aphanius iberus	KU174267	H65	NO	UNDET	37.6362	-0.716646	Marchamalo	40	South Spain	KU174267
Aphanius iberus	KU174268	H65	NO	UNDET	37.6362	-0.716646	Marchamalo	40	South Spain	KU174268
Aphanius iberus	KU174318	H67	NO	UNDET	37.6362	-0.716646	Marchamalo	40	South Spain	KU174318
Aphanius iberus	KU174308	H65	NO	UNDET	37.5487	-1.40066	Rambla Pinillas	41	South Spain	KU174308
Aphanius iberus	KU174309	H65	NO	UNDET	37.5487	-1.40066	Rambla Pinillas	41	South Spain	KU174309
Aphanius iberus	KU174310	H65	NO	UNDET	37.5487	-1.40066	Rambla Pinillas	41	South Spain	KU174310
Aphanius iberus	KU174311	H65	NO	UNDET	37.5487	-1.40066	Rambla Pinillas	41	South Spain	KU174311
Aphanius iberus	KU174312	H65	NO	UNDET	37.5487	-1.40066	Rambla Pinillas	41	South Spain	KU174312
Aphanius baeticus	AF299282	H21	NO	UNDET	36.9347	6.41975	PN Doñana	43	A. baeticus	AF299282
Aphanius baeticus	AF299280	H22	NO	UNDET	36.2868	-6.05437	Rio Salado de Lebrija	44	A. baeticus	AF299280
Aphanius baeticus	AF299281	H23	NO	UNDET	36.2868	-6.05437	Rio Salado de Lebrija	44	A. baeticus	AF299281
Aphanius baeticus	AF299284	H24	NO	UNDET	36.4157	-6.11886	Chiclana Río Iro	42	A. baeticus	AF299284
Aphanius baeticus	AF299285	H25	NO	UNDET	36.4157	-6.11886	Chiclana Río Iro	42	A. baeticus	AF299285
Aphanius baeticus	KU174378	H26	NO	UNDET	38.6323	-0.919538	Chiclana Río Iro	42	A. baeticus	KU174378
Aphanius iberus	AY155569	H42	NO	UNDET	-	-	Captivity	-	-	AY155569
Aphanius iberus	KU174219	H43	NO	UNDET	37.7158	-0.862715	Carmoli	35	South Spain	KU174219
Anatolichtys anatoliae	AT6981	-	NO	UNDET	-	-	Captivity	-	-	XXX
Aphanius baeticus	AT30199	-	YES	UNDET	36.9154	-5.94844	Rio Salado de Lebrija	44	A. baeticus	XXX
